# Supplementary material
Source: PubMed Central journal article supplement (PMC9275213)
Supplement: aem.00482-22-s0001.pdf [file aem.00482-22-s0001.pdf]

*Applied and Environmental Microbiology*

**Supplementary information**

**Geographic dispersal limitation dominated assembly processes of bacterial communities on microplastics, compared to water and sediment**

Weihong Zhang <sup>a,b,c,1</sup>, Lu Chen <sup>a,b,1</sup>, Haiyang Chen<sup>d</sup>, Wenzhi Liu <sup>a,b</sup>, Yuyi Yang <sup>a,b,e,\*</sup>

<sup>a</sup> *Key Laboratory of Aquatic Botany and Watershed Ecology, Wuhan Botanical Garden, Chinese Academy of Sciences, Wuhan, 430074, China*

<sup>b</sup> *Center of the Plant Ecology, Core Botanical Gardens, Chinese Academy of Sciences, Wuhan, 430074, China*

<sup>c</sup> *University of Chinese Academy of Sciences, Beijing, 100049, China*

<sup>d</sup> *College of Water Sciences, Beijing Normal University, No. 19, Xijiekouwai Street, Beijing, 100875, China*

<sup>e</sup> *Sino-Africa Joint Research Center, Chinese Academy of Sciences, Wuhan 430074, China*

<sup>1</sup> *The authors contributed equally to this paper.*

***Corresponding author***

Prof. Yuyi Yang (yangyy@wbcas.cn)

## **The information of table supplementary materials**

**See in the “Supplementary Materials.xlsm”**

**Table S1.** The normalisation OTU table was carried out by rarefaction.

**Table S2.** The composition difference of bacterial communities between the microplastics and water were evaluated by limma voom.

**Table S3.** The composition difference of bacterial communities between the microplastics and sediment were evaluated by limma voom.

**Table S4.** Data used for Venn diagram at the family taxonomic level.

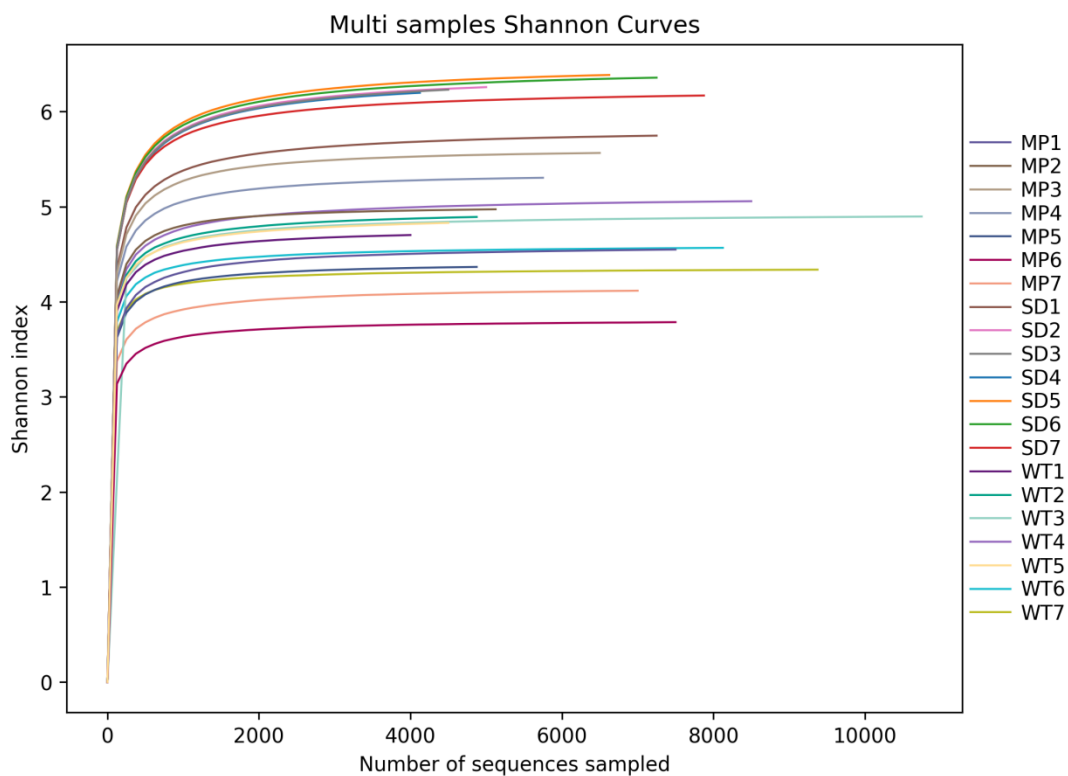

**Fig. S1.** The rarefaction curve for the sequencing of all microplastics, water, and sediment samples. The X-axis represents the number of sequences picked randomly, species can be found. New OTUs could not be found by increasing the number of sampling sequences after saturation. MP1-7 were the microplastics samples, WT1-7 were the water sample, and SD1-7 were the sediment samples.
